# Supplementary material for: Stable global tubular boron clusters in Na2B18 and Na2B18−
Source: PubMed Central journal article supplement — RSC Adv. 2019 Feb 6;9(8):4665–70. doi: 10.1039/c8ra10123j (PMC9060594; doi:10.1039/c8ra10123j), 2019-02-06
Supplement: RA-009-C8RA10123J-s001.pdf [file RA-009-C8RA10123J-s001.pdf]

## Supporting Information

### Stable global tubular boron clusters in $\text{Na}_2\text{B}_{18}$ and $\text{Na}_2\text{B}_{18}^-$

Dong Xue,<sup>a</sup> Anita Das,<sup>b</sup> Wei-yan Liang,<sup>a</sup> Meng-hui Wang,<sup>a</sup> Zhong-hua Cui,<sup>\*a</sup>

*<sup>a</sup>Institute of Atomic and Molecular Physics, Jilin Provincial Key Laboratory of Applied Atomic and Molecular Spectroscopy, Jilin University, Changchun, China*

*<sup>b</sup>Department of Chemistry, Indian Institute of Engineering Science and Technology, Shibpur, Howrah, India*

Email: [zcui@jlu.edu.cn](mailto:zcui@jlu.edu.cn)

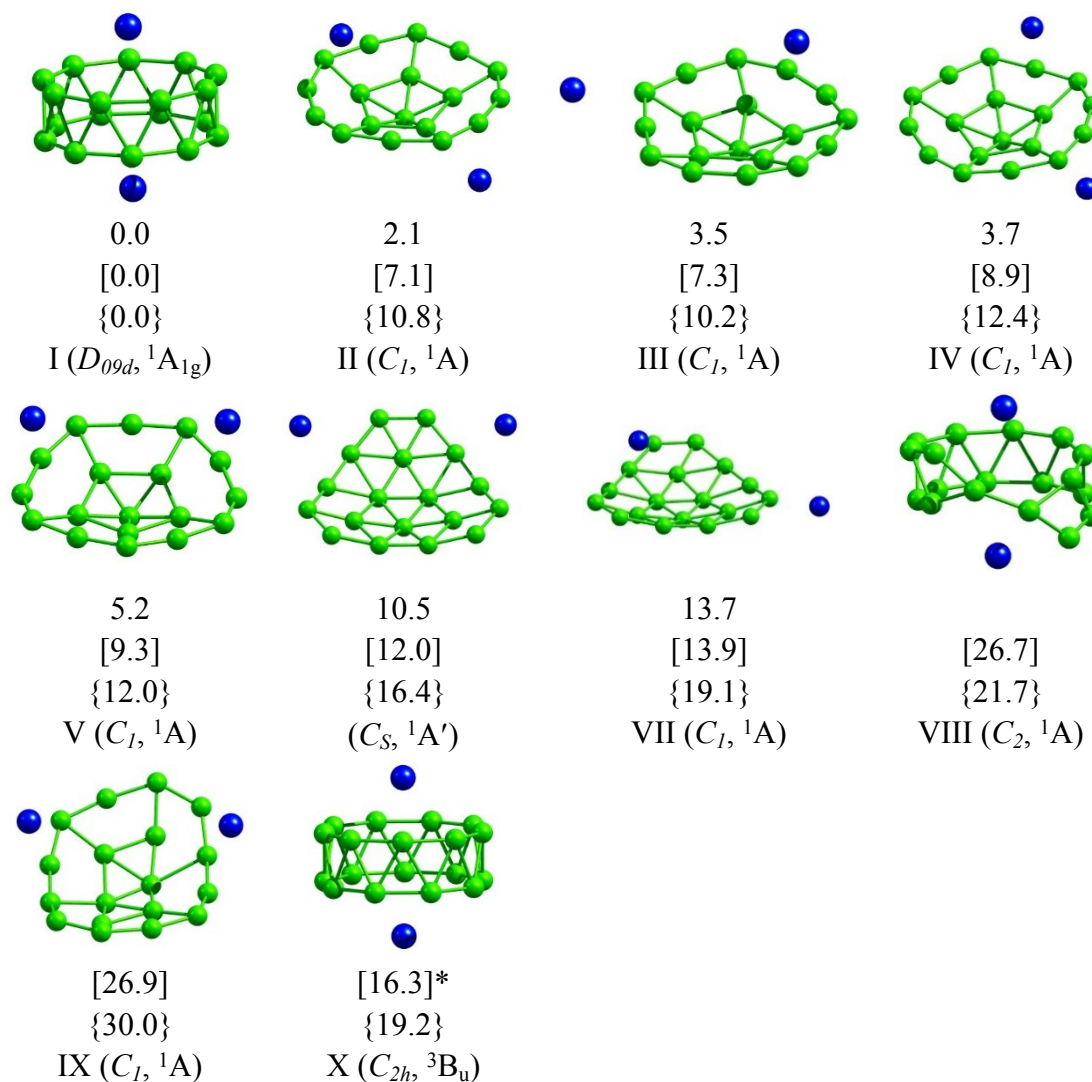

**Figure S1.** Structures of the lowest lying isomers of the  $\text{Na}_2\text{B}_{18}$  species at the TPSSh/6-311+G(d) level. Relative energies in kcal/mol were computed at the CCSD(T)/6-311+G(d)//TPSSh/6-311+G(d) level, TPSSh/6-311+G(d) (in square brackets), and B3LYP/6-311+G(d) (in curly brackets) levels. All energies are corrected for zero-point energies (ZPE) at their respective levels except for the CCSD(T) single-point calculations, which are ZPE corrected at TPSSh/6-311+G(d). “\*” means that a small imaginary frequencies occurred in this level. The point group symmetries and spectroscopic states of lowest lying isomer are shown in parentheses.

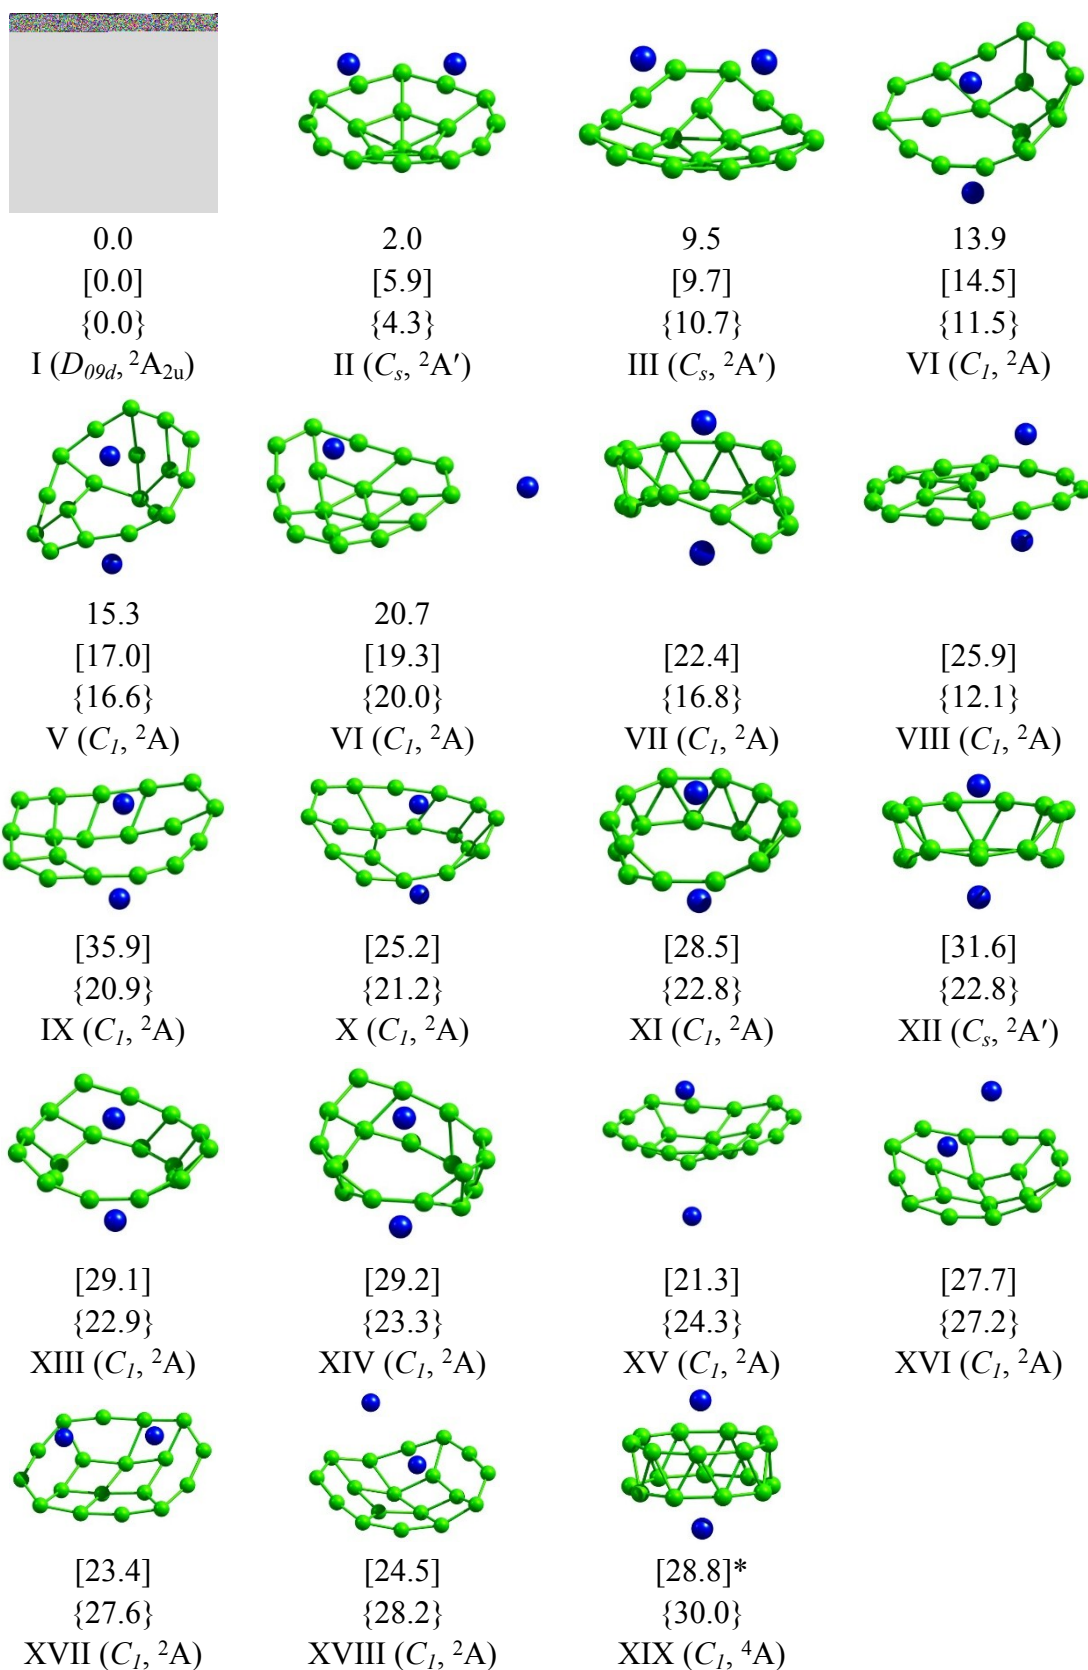

**Figure S2.** Structures of the lowest lying isomers of the  $\text{Na}_2\text{B}_{18}^-$  species at the TPSSh/6-311+G(d) level. Relative energies in kcal/mol were computed at the

CCSD(T)/6-311+G(d)//TPSSh/6-311+G(d) level, TPSSh/6-311+G(d) (in square brackets), and B3LYP/6-311+G(d) (in curly brackets) levels. All energies are corrected for zero-point energies (ZPE) at their respective levels except for the CCSD(T) single-point calculations, which are ZPE corrected at TPSSh/6-311+G(d). “\*” means that a small imaginary frequencies occurred in this level. The point group symmetries and spectroscopic states of lowest lying isomer are shown in parentheses.

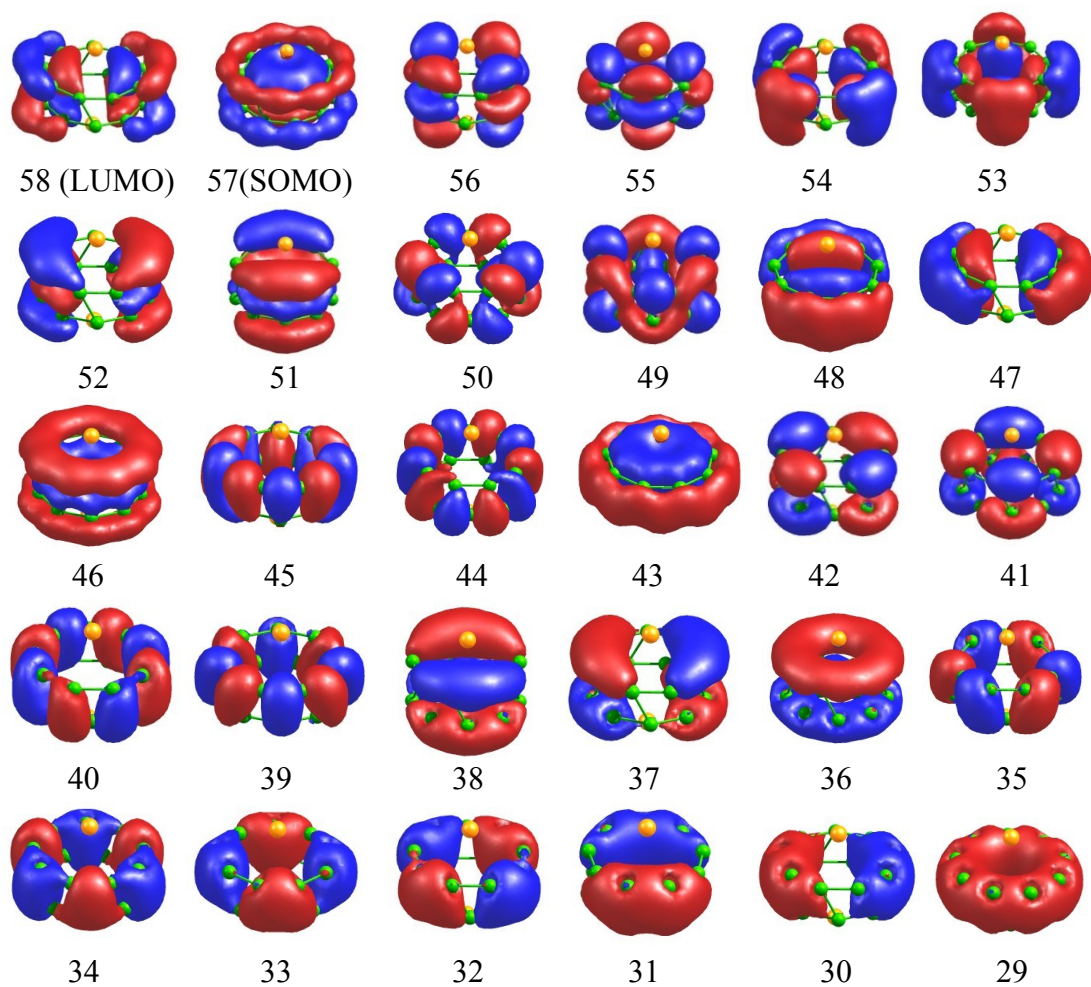

**Figure S3.** The valence molecular orbitals of the  $C_{2h}$  structure of  $\text{Na}_2\text{B}_8^-$  obtained at the B3LYP/6-311+G(d) level.

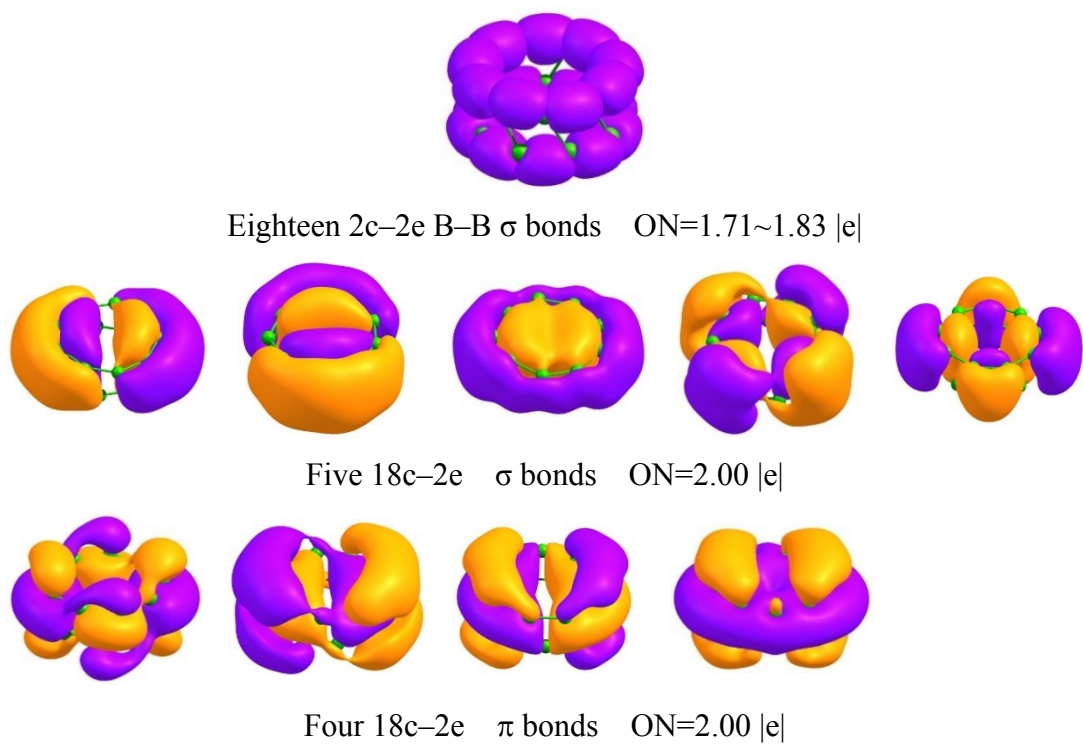

**Figure S4.** AdNDP analysis for B<sub>18</sub> computed at the B3LYP/6-311+G(d) level, and ON stands for occupation number.

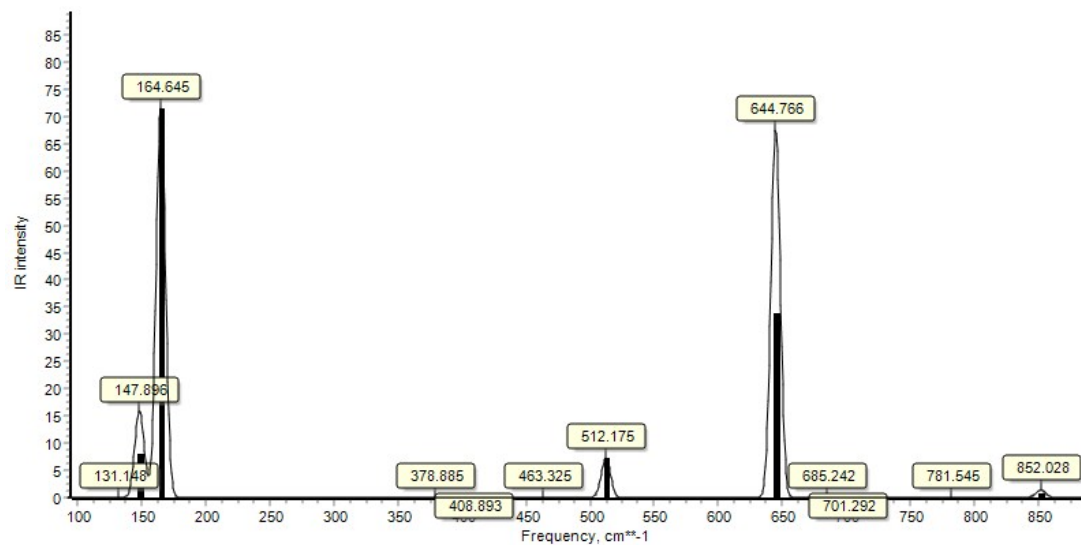

(a)

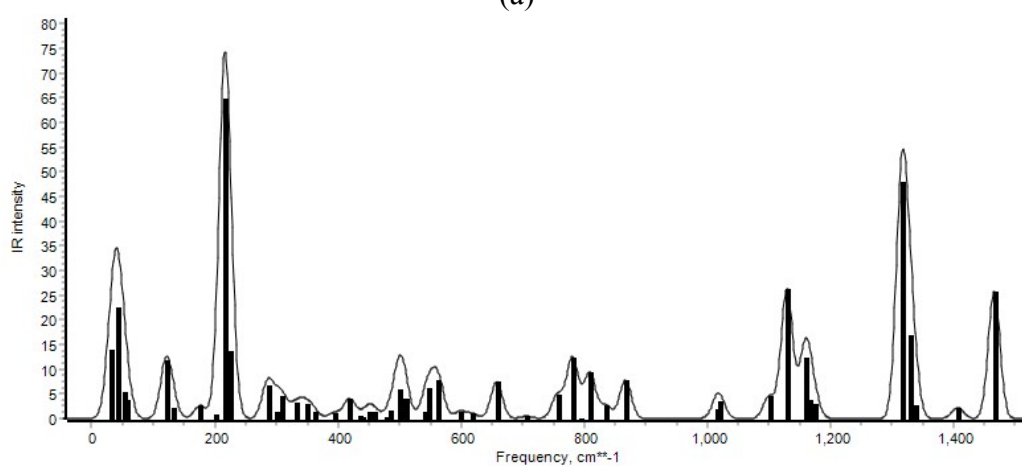

(b)

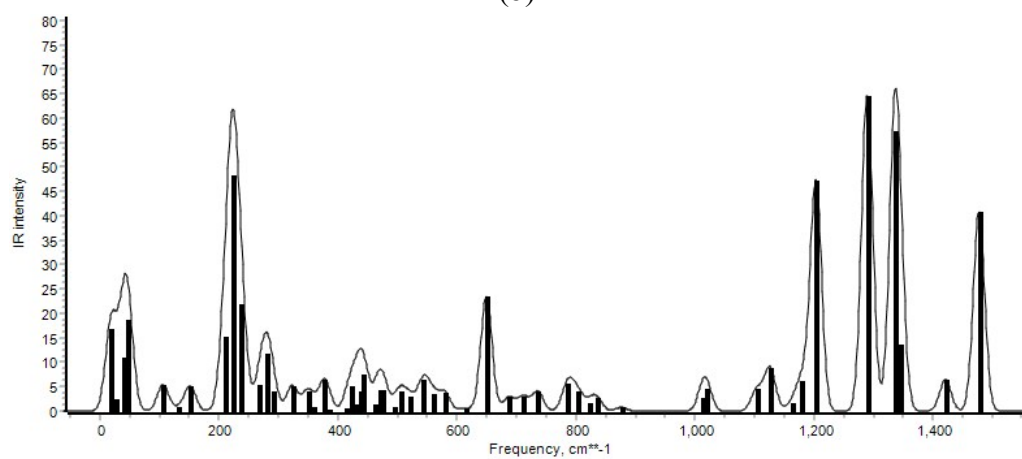

(c)

**Figure S5.** Calculated infrared (IR) absorption spectra (in  $\text{cm}^{-1}$ ) of (a) tubular structure (b) second and (c) third lowest isomer of  $\text{Na}_2\text{B}_{18}$  computed at the B3LYP/6-311+G(d) level.



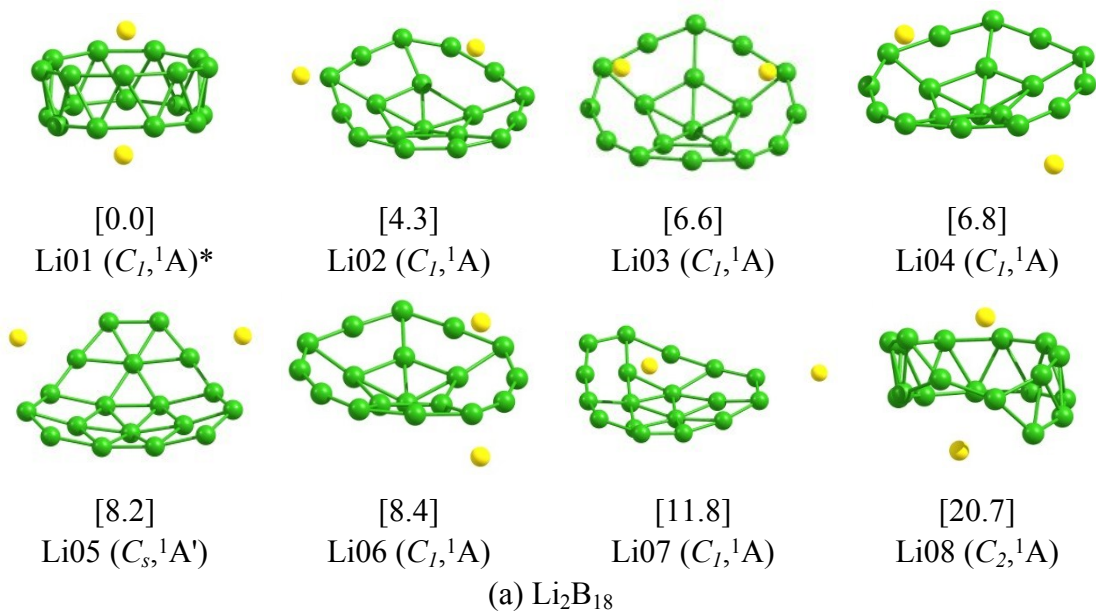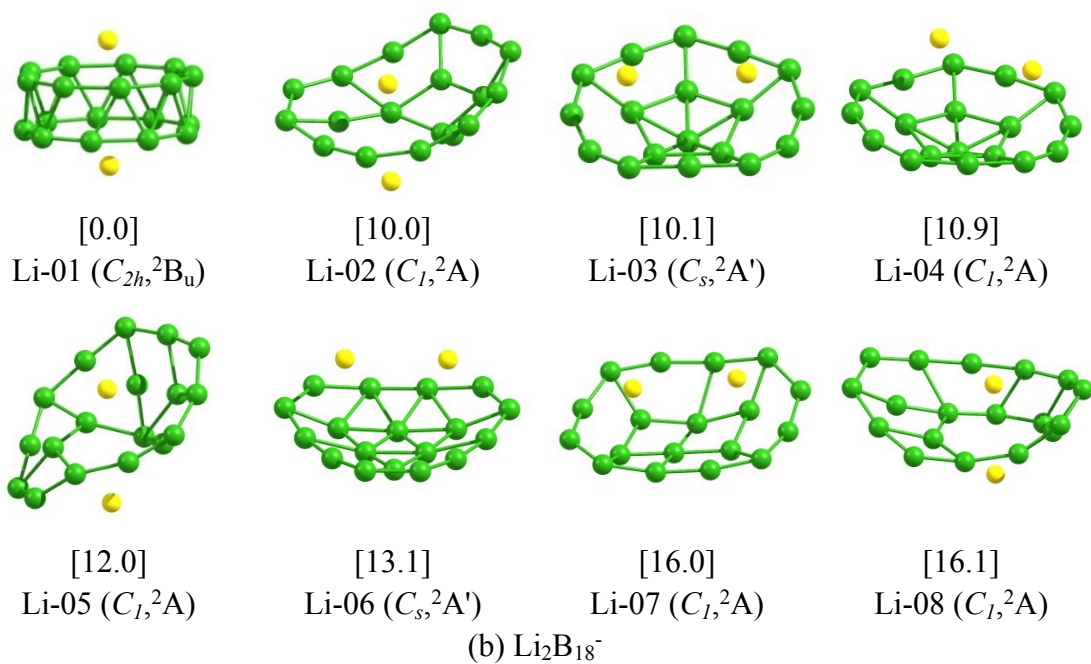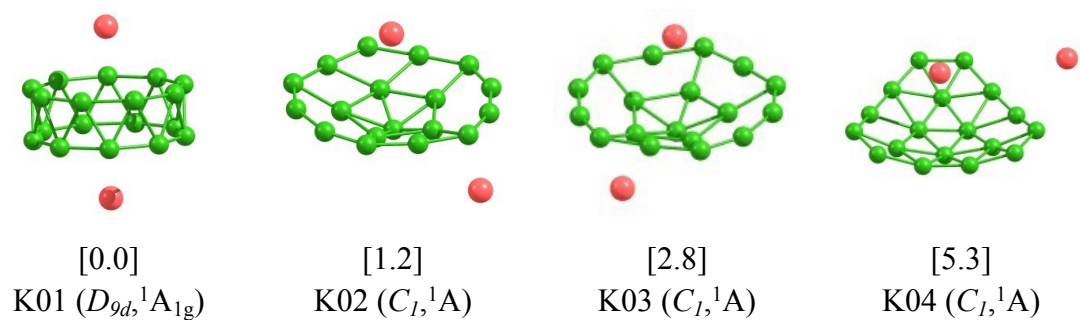



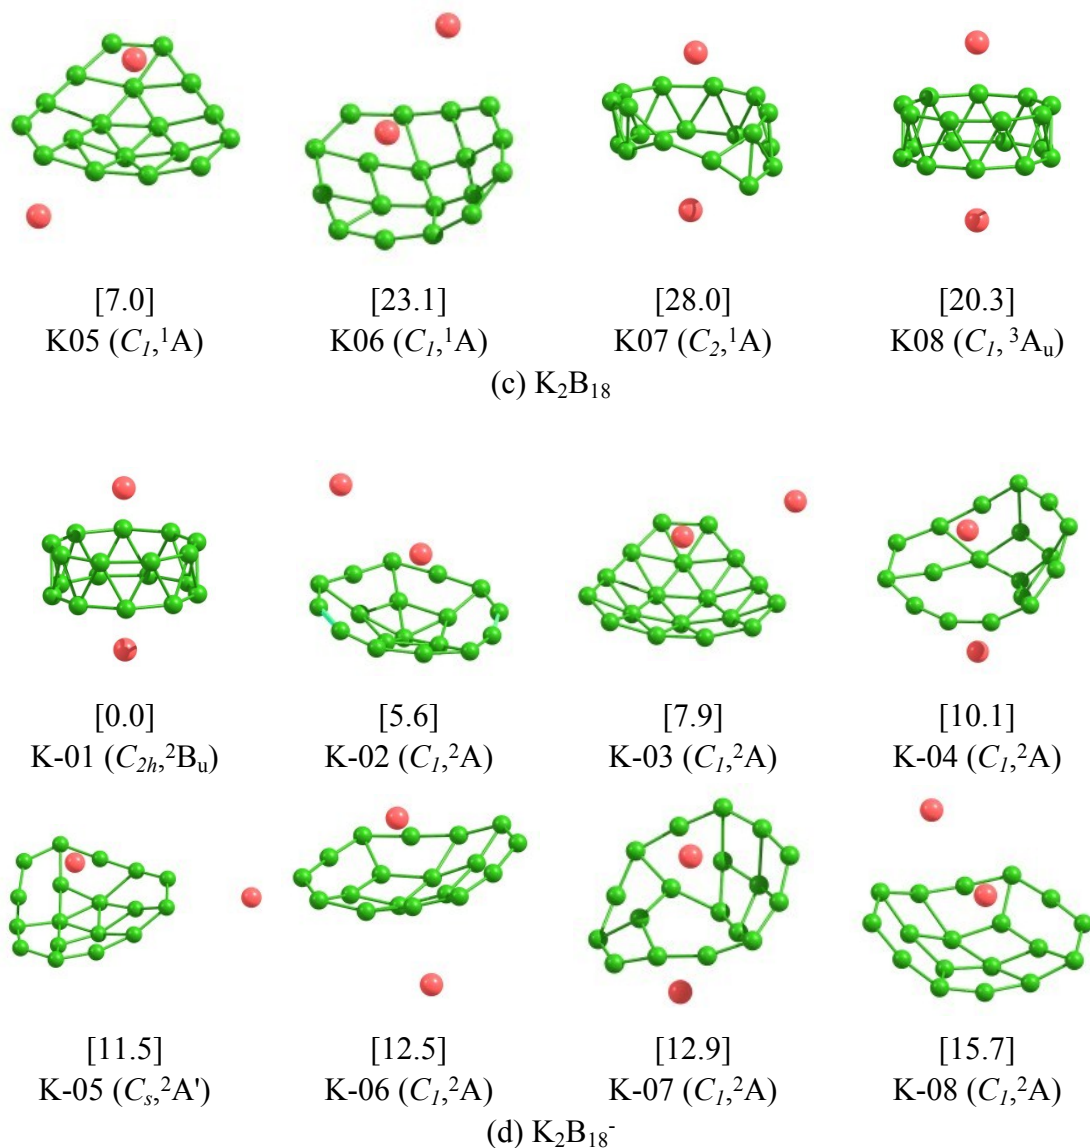

**Figure S6.** Structures and relative energies (kcal/mol) of the lowest lying isomers of the (a)  $Li_2B_{18}$ , (b)  $Li_2B_{18}^-$ , (c)  $K_2B_{18}$ , and (d)  $K_2B_{18}^-$  species at the TPSSh/6-311+G(d) level. All energies are corrected for zero-point energies (ZPE). “\*” means that a small imaginary frequencies occurred in this level. The point group symmetries and spectroscopic states of lowest lying isomer are shown in parentheses.

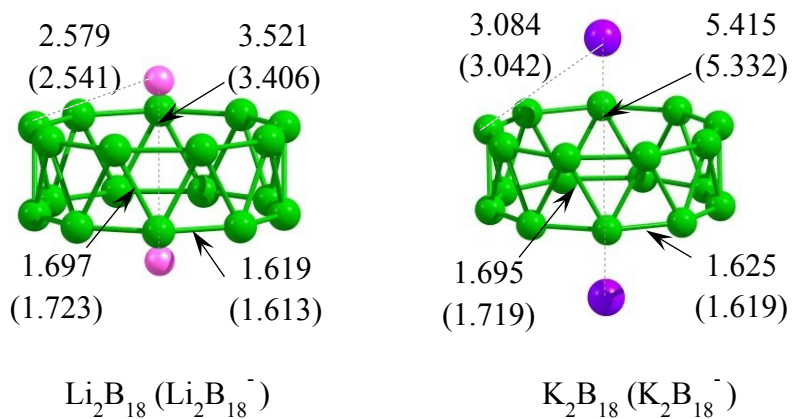

**Figure S7.** Structures of  $\text{M}_2\text{B}_{18}$  and  $\text{M}_2\text{B}_{18}^-$  ( $\text{M}=\text{Li}, \text{K}$ ) computed at the TPSSh/6-311+G(d) level. All distances are in Å and the values shown in parenthesis refer to the anionic  $\text{M}_2\text{B}_{18}^-$  system.

**Table S1.** The calculated vertical detachment energies (VDE) from the ground state for  $\text{Na}_2\text{B}_{18}^-$ . All energies are in eV.

| Feature | Final state and electronic configuration                                                                | VDE<br>TD-B3LYP |
|---------|---------------------------------------------------------------------------------------------------------|-----------------|
| X       | $^1\text{A}_{1g}; 7\text{A}_{1g}^2 5\text{E}_{1u}^4 3\text{E}_{1g}^4 4\text{E}_{1g}^4 6\text{A}_{2u}^0$ | 1.65            |
| A       | $^3\text{E}_{1u}; 7\text{A}_{1g}^2 5\text{E}_{1u}^4 3\text{E}_{1g}^4 4\text{E}_{1g}^3 6\text{A}_{2u}^1$ | 2.63            |
| B       | $^1\text{E}_{1u}; 7\text{A}_{1g}^2 5\text{E}_{1u}^4 3\text{E}_{1g}^4 4\text{E}_{1g}^3 6\text{A}_{2u}^1$ | 2.75            |
| C       | $^3\text{E}_{1u}; 7\text{A}_{1g}^2 5\text{E}_{1u}^4 3\text{E}_{1g}^3 4\text{E}_{1g}^4 6\text{A}_{2u}^1$ | 3.30            |
| D       | $^1\text{E}_{1u}; 7\text{A}_{1g}^2 5\text{E}_{1u}^4 3\text{E}_{1g}^3 4\text{E}_{1g}^4 6\text{A}_{2u}^1$ | 3.60            |
| E       | $^3\text{E}_{1g}; 7\text{A}_{1g}^2 5\text{E}_{1u}^3 3\text{E}_{1g}^4 4\text{E}_{1g}^4 6\text{A}_{2u}^1$ | 5.19            |
| F       | $^1\text{E}_{1g}; 7\text{A}_{1g}^2 5\text{E}_{1u}^3 3\text{E}_{1g}^4 4\text{E}_{1g}^4 6\text{A}_{2u}^1$ | 5.43            |

The first two VDEs were calculated at the B3LYP/6-311+G(2df)//B3LYP/6-311+G\* level of theory as the lowest transition from the doublet state of the anion into the final lowest singlet and triplet states of the neutral species. Then the vertical excitation energies of the neutral species in the lowest singlet and triplet states (at the TD-B3LYP level) were added to the first two VDEs, respectively, in order to obtain higher VDEs.

**Table S2.** The calculated vertical detachment energies (VDE) from the second lowest isomer of  $\text{Na}_2\text{B}_{18}^-$ . All energies are in eV.

| Feature | Final state and electronic configuration                                                                                                                                  | VDE<br>TD-B3LYP |
|---------|---------------------------------------------------------------------------------------------------------------------------------------------------------------------------|-----------------|
| X       | $^1\text{A}'$ ; $21\text{A}''^2$ $29\text{A}''^2$ $22\text{A}''^2$ $23\text{A}''^2$ $30\text{A}''^2$ $31\text{A}''^2$ $24\text{A}''^2$ $32\text{A}''^2$ $33\text{A}''^0$  | 2.55            |
| A       | $^3\text{A}'$ ; $21\text{A}''^2$ $29\text{A}''^2$ $22\text{A}''^2$ $23\text{A}''^2$ $30\text{A}''^2$ $31\text{A}''^2$ $24\text{A}''^2$ $32\text{A}''^1$ $33\text{A}''^1$  | 3.89            |
| B       | $^1\text{A}'$ ; $21\text{A}''^2$ $29\text{A}''^2$ $22\text{A}''^2$ $23\text{A}''^2$ $30\text{A}''^2$ $31\text{A}''^2$ $24\text{A}''^2$ $32\text{A}''^1$ $33\text{A}''^1$  | 3.66            |
| C       | $^3\text{A}''$ ; $21\text{A}''^2$ $29\text{A}''^2$ $22\text{A}''^2$ $23\text{A}''^2$ $30\text{A}''^2$ $31\text{A}''^2$ $24\text{A}''^1$ $32\text{A}''^2$ $33\text{A}''^1$ | 4.10            |
| D       | $^1\text{A}''$ ; $21\text{A}''^2$ $29\text{A}''^2$ $22\text{A}''^2$ $23\text{A}''^2$ $30\text{A}''^2$ $31\text{A}''^2$ $24\text{A}''^1$ $32\text{A}''^2$ $33\text{A}''^1$ | 3.79            |
| E       | $^3\text{A}'$ ; $21\text{A}''^2$ $29\text{A}''^2$ $22\text{A}''^2$ $23\text{A}''^2$ $30\text{A}''^2$ $31\text{A}''^1$ $24\text{A}''^2$ $32\text{A}''^2$ $33\text{A}''^1$  | 4.20            |
| F       | $^1\text{A}'$ ; $21\text{A}''^2$ $29\text{A}''^2$ $22\text{A}''^2$ $23\text{A}''^2$ $30\text{A}''^2$ $31\text{A}''^1$ $24\text{A}''^2$ $32\text{A}''^2$ $33\text{A}''^1$  | 3.92            |
| G       | $^3\text{A}'$ ; $21\text{A}''^2$ $29\text{A}''^2$ $22\text{A}''^2$ $23\text{A}''^2$ $30\text{A}''^1$ $31\text{A}''^2$ $24\text{A}''^2$ $32\text{A}''^2$ $33\text{A}''^1$  | 4.33            |
| H       | $^1\text{A}'$ ; $21\text{A}''^2$ $29\text{A}''^2$ $22\text{A}''^2$ $23\text{A}''^2$ $30\text{A}''^1$ $31\text{A}''^2$ $24\text{A}''^2$ $32\text{A}''^2$ $33\text{A}''^1$  | 4.14            |
| I       | $^3\text{A}''$ ; $21\text{A}''^2$ $29\text{A}''^2$ $22\text{A}''^2$ $23\text{A}''^1$ $30\text{A}''^2$ $31\text{A}''^2$ $24\text{A}''^2$ $32\text{A}''^2$ $33\text{A}''^1$ | 4.49            |
| J       | $^1\text{A}''$ ; $21\text{A}''^2$ $29\text{A}''^2$ $22\text{A}''^2$ $23\text{A}''^1$ $30\text{A}''^2$ $31\text{A}''^2$ $24\text{A}''^2$ $32\text{A}''^2$ $33\text{A}''^1$ | 4.13            |
| K       | $^3\text{A}''$ ; $21\text{A}''^2$ $29\text{A}''^2$ $22\text{A}''^1$ $23\text{A}''^2$ $30\text{A}''^2$ $31\text{A}''^2$ $24\text{A}''^2$ $32\text{A}''^2$ $33\text{A}''^1$ | 6.14            |
| L       | $^1\text{A}''$ ; $21\text{A}''^2$ $29\text{A}''^2$ $22\text{A}''^1$ $23\text{A}''^2$ $30\text{A}''^2$ $31\text{A}''^2$ $24\text{A}''^2$ $32\text{A}''^2$ $33\text{A}''^1$ | 5.80            |
| M       | $^3\text{A}'$ ; $21\text{A}''^2$ $29\text{A}''^1$ $22\text{A}''^2$ $23\text{A}''^2$ $30\text{A}''^2$ $31\text{A}''^2$ $24\text{A}''^2$ $32\text{A}''^2$ $33\text{A}''^1$  | 6.13            |
| N       | $^1\text{A}''$ ; $21\text{A}''^2$ $29\text{A}''^1$ $22\text{A}''^2$ $23\text{A}''^2$ $30\text{A}''^2$ $31\text{A}''^2$ $24\text{A}''^2$ $32\text{A}''^2$ $33\text{A}''^1$ | 5.81            |

The first two VDEs were calculated at the B3LYP/6-311+G(2df)//B3LYP/6-311+G\* level of theory as the lowest transition from the doublet state of the anion into the final lowest singlet and triplet states of the neutral species. Then the vertical excitation energies of the neutral species in the lowest singlet and triplet states (at the TD-B3LYP level) were added to the first two VDEs, respectively, in order to obtain higher VDEs.

**Table S3.** The calculated vertical detachment energies (VDE) from the third lowest isomer of  $\text{Na}_2\text{B}_{18}^-$ . All energies are in eV.

| Feature | Final state and electronic configuration                                                                                                                                                                                                      | VDE<br>TD-B3LYP |
|---------|-----------------------------------------------------------------------------------------------------------------------------------------------------------------------------------------------------------------------------------------------|-----------------|
| X       | $^1\text{A}'$ ; $28\text{A}^{\prime 2} 22\text{A}^{\prime \prime 2} 29\text{A}^{\prime 2} 23\text{A}^{\prime \prime 2} 30\text{A}^{\prime 2} 31\text{A}^{\prime 2} 24\text{A}^{\prime \prime 2} 32\text{A}^{\prime 2} 33\text{A}^{\prime 0}$  | 2.68            |
| A       | $^3\text{A}'$ ; $28\text{A}^{\prime 2} 22\text{A}^{\prime \prime 2} 29\text{A}^{\prime 2} 23\text{A}^{\prime \prime 2} 30\text{A}^{\prime 2} 31\text{A}^{\prime 2} 24\text{A}^{\prime \prime 2} 32\text{A}^{\prime 1} 33\text{A}^{\prime 1}$  | 3.81            |
| B       | $^1\text{A}'$ ; $28\text{A}^{\prime 2} 22\text{A}^{\prime \prime 2} 29\text{A}^{\prime 2} 23\text{A}^{\prime \prime 2} 30\text{A}^{\prime 2} 31\text{A}^{\prime 2} 24\text{A}^{\prime \prime 2} 32\text{A}^{\prime 1} 33\text{A}^{\prime 1}$  | 3.49            |
| C       | $^3\text{A}''$ ; $28\text{A}^{\prime 2} 22\text{A}^{\prime \prime 2} 29\text{A}^{\prime 2} 23\text{A}^{\prime \prime 2} 30\text{A}^{\prime 2} 31\text{A}^{\prime 2} 24\text{A}^{\prime \prime 1} 32\text{A}^{\prime 2} 33\text{A}^{\prime 1}$ | 3.85            |
| D       | $^1\text{A}''$ ; $28\text{A}^{\prime 2} 22\text{A}^{\prime \prime 2} 29\text{A}^{\prime 2} 23\text{A}^{\prime \prime 2} 30\text{A}^{\prime 2} 31\text{A}^{\prime 2} 24\text{A}^{\prime \prime 1} 32\text{A}^{\prime 2} 33\text{A}^{\prime 1}$ | 3.57            |
| E       | $^3\text{A}'$ ; $28\text{A}^{\prime 2} 22\text{A}^{\prime \prime 2} 29\text{A}^{\prime 2} 23\text{A}^{\prime \prime 2} 30\text{A}^{\prime 2} 31\text{A}^{\prime 1} 24\text{A}^{\prime \prime 2} 32\text{A}^{\prime 2} 33\text{A}^{\prime 1}$  | 3.87            |
| F       | $^1\text{A}'$ ; $28\text{A}^{\prime 2} 22\text{A}^{\prime \prime 2} 29\text{A}^{\prime 2} 23\text{A}^{\prime \prime 2} 30\text{A}^{\prime 2} 31\text{A}^{\prime 1} 24\text{A}^{\prime \prime 2} 32\text{A}^{\prime 2} 33\text{A}^{\prime 1}$  | 3.63            |
| G       | $^3\text{A}'$ ; $28\text{A}^{\prime 2} 22\text{A}^{\prime \prime 2} 29\text{A}^{\prime 2} 23\text{A}^{\prime \prime 2} 30\text{A}^{\prime 1} 31\text{A}^{\prime 2} 24\text{A}^{\prime \prime 2} 32\text{A}^{\prime 2} 33\text{A}^{\prime 1}$  | 4.20            |
| H       | $^1\text{A}'$ ; $28\text{A}^{\prime 2} 22\text{A}^{\prime \prime 2} 29\text{A}^{\prime 2} 23\text{A}^{\prime \prime 2} 30\text{A}^{\prime 1} 31\text{A}^{\prime 2} 24\text{A}^{\prime \prime 2} 32\text{A}^{\prime 2} 33\text{A}^{\prime 1}$  | 4.02            |
| I       | $^3\text{A}''$ ; $28\text{A}^{\prime 2} 22\text{A}^{\prime \prime 2} 29\text{A}^{\prime 2} 23\text{A}^{\prime \prime 1} 30\text{A}^{\prime 2} 31\text{A}^{\prime 2} 24\text{A}^{\prime \prime 2} 32\text{A}^{\prime 2} 33\text{A}^{\prime 1}$ | 5.06            |
| J       | $^1\text{A}''$ ; $28\text{A}^{\prime 2} 22\text{A}^{\prime \prime 2} 29\text{A}^{\prime 2} 23\text{A}^{\prime \prime 1} 30\text{A}^{\prime 2} 31\text{A}^{\prime 2} 24\text{A}^{\prime \prime 2} 32\text{A}^{\prime 2} 33\text{A}^{\prime 1}$ | 4.74            |
| K       | $^3\text{A}'$ ; $28\text{A}^{\prime 2} 22\text{A}^{\prime \prime 2} 29\text{A}^{\prime 1} 23\text{A}^{\prime \prime 2} 30\text{A}^{\prime 2} 31\text{A}^{\prime 2} 24\text{A}^{\prime \prime 2} 32\text{A}^{\prime 2} 33\text{A}^{\prime 1}$  | 5.35            |
| L       | $^1\text{A}'$ ; $28\text{A}^{\prime 2} 22\text{A}^{\prime \prime 2} 29\text{A}^{\prime 1} 23\text{A}^{\prime \prime 2} 30\text{A}^{\prime 2} 31\text{A}^{\prime 2} 24\text{A}^{\prime \prime 2} 32\text{A}^{\prime 2} 33\text{A}^{\prime 1}$  | 5.07            |
| M       | $^3\text{A}''$ ; $28\text{A}^{\prime 2} 22\text{A}^{\prime \prime 1} 29\text{A}^{\prime 2} 23\text{A}^{\prime \prime 2} 30\text{A}^{\prime 2} 31\text{A}^{\prime 2} 24\text{A}^{\prime \prime 2} 32\text{A}^{\prime 2} 33\text{A}^{\prime 1}$ | 5.50            |
| N       | $^1\text{A}''$ ; $28\text{A}^{\prime 2} 22\text{A}^{\prime \prime 1} 29\text{A}^{\prime 2} 23\text{A}^{\prime \prime 2} 30\text{A}^{\prime 2} 31\text{A}^{\prime 2} 24\text{A}^{\prime \prime 2} 32\text{A}^{\prime 2} 33\text{A}^{\prime 1}$ | 5.24            |

The first two VDEs were calculated at the B3LYP/6-311+G(2df)//B3LYP/6-311+G\* level of theory as the lowest transition from the doublet state of the anion into the final lowest singlet and triplet states of the neutral species. Then the vertical excitation energies of the neutral species in the lowest singlet and triplet states (at the TD-B3LYP level) were added to the first two VDEs, respectively, in order to obtain higher VDEs.

**Table S4. Coordinates** $\text{Na}_2\text{B}_{18}$ 

|    |              |              |              |
|----|--------------|--------------|--------------|
| Na | 2.232560000  | 0.000000000  | 0.000000000  |
| Na | -2.232560000 | 0.000000000  | 0.000000000  |
| B  | -0.740516000 | 0.000000000  | -2.373811000 |
| B  | 0.740516000  | 0.000000000  | 2.373811000  |
| B  | 0.740516000  | 1.525857000  | 1.818445000  |
| B  | 0.740516000  | 2.337748000  | 0.412208000  |
| B  | 0.740516000  | 2.055781000  | -1.186906000 |
| B  | 0.740516000  | 0.811891000  | -2.230653000 |
| B  | 0.740516000  | -0.811891000 | -2.230653000 |
| B  | 0.740516000  | -2.055781000 | -1.186906000 |
| B  | 0.740516000  | -2.337748000 | 0.412208000  |
| B  | 0.740516000  | -1.525857000 | 1.818445000  |
| B  | -0.740516000 | 1.525857000  | -1.818445000 |
| B  | -0.740516000 | 2.337748000  | -0.412208000 |
| B  | -0.740516000 | 2.055781000  | 1.186906000  |
| B  | -0.740516000 | 0.811891000  | 2.230653000  |
| B  | -0.740516000 | -0.811891000 | 2.230653000  |
| B  | -0.740516000 | -2.055781000 | 1.186906000  |
| B  | -0.740516000 | -2.337748000 | -0.412208000 |
| B  | -0.740516000 | -1.525857000 | -1.818445000 |

 $\text{Na}_2\text{B}_{18}^-$ 

|    |              |              |              |
|----|--------------|--------------|--------------|
| B  | 2.050440000  | -1.183822000 | 0.755251000  |
| B  | 0.000000000  | 2.367645000  | 0.755251000  |
| B  | -2.050440000 | -1.183822000 | 0.755251000  |
| B  | -2.331675000 | -0.411137000 | -0.755251000 |
| B  | 1.521893000  | -1.813721000 | -0.755251000 |
| B  | 0.809782000  | 2.224858000  | -0.755251000 |
| B  | 2.331675000  | -0.411137000 | -0.755251000 |
| B  | -0.809782000 | 2.224858000  | -0.755251000 |
| B  | -1.521893000 | -1.813721000 | -0.755251000 |
| B  | -2.331675000 | 0.411137000  | 0.755251000  |
| B  | 0.809782000  | -2.224858000 | 0.755251000  |
| B  | 1.521893000  | 1.813721000  | 0.755251000  |
| B  | 2.331675000  | 0.411137000  | 0.755251000  |
| B  | -1.521893000 | 1.813721000  | 0.755251000  |
| B  | -0.809782000 | -2.224858000 | 0.755251000  |
| B  | -2.050440000 | 1.183822000  | -0.755251000 |
| B  | 0.000000000  | -2.367645000 | -0.755251000 |
| B  | 2.050440000  | 1.183822000  | -0.755251000 |
| Na | 0.000000000  | 0.000000000  | -2.146179000 |
| Na | 0.000000000  | 0.000000000  | 2.146179000  |
